# Supplementary material for: MWCNTs as a catalyst in oxy-steam reforming of methanol
Source: Royal Society of Chemistry journal article supplement (doi:10.1039/c6ra15618e), 2016-01-01
Supplement: c6ra15618e1.pdf [file c6ra15618e1.pdf]

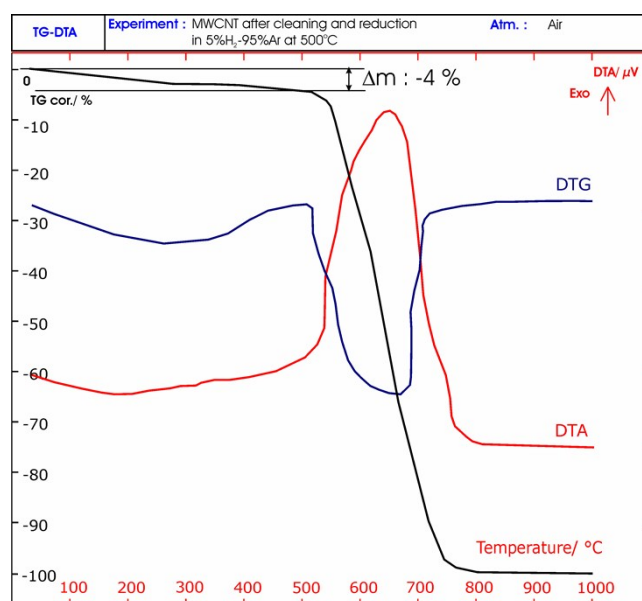

Fig.S1.Decomposition of MWCNT (cleaned with HCl and reduced in 5% $H_2$ -95%Ar at 500 °C) in air atmosphere.

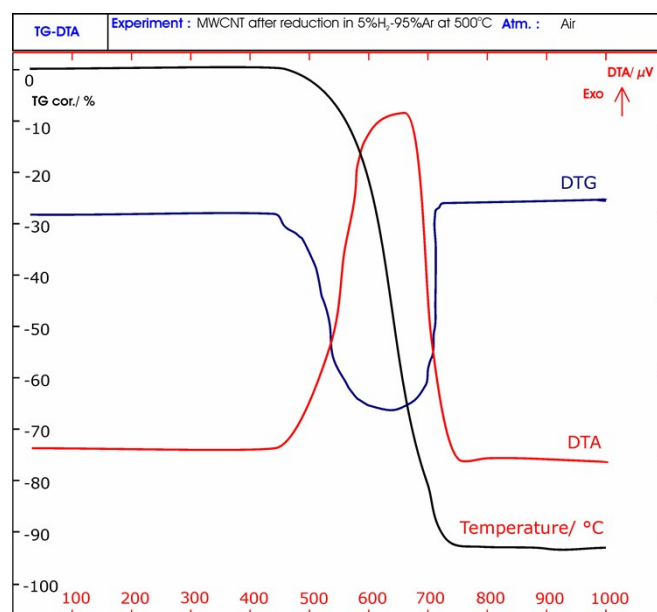

Fig.S2.Decomposition of pristine MWCNT (reduced in a mixture of 5% $H_2$ -95%Ar at 500 °C) in air atmosphere.

A

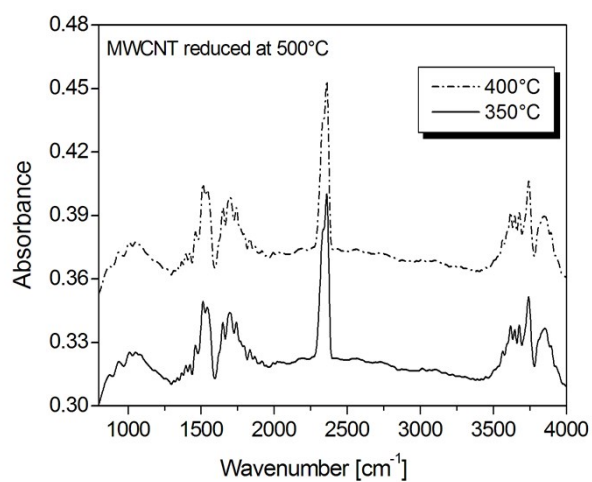

B

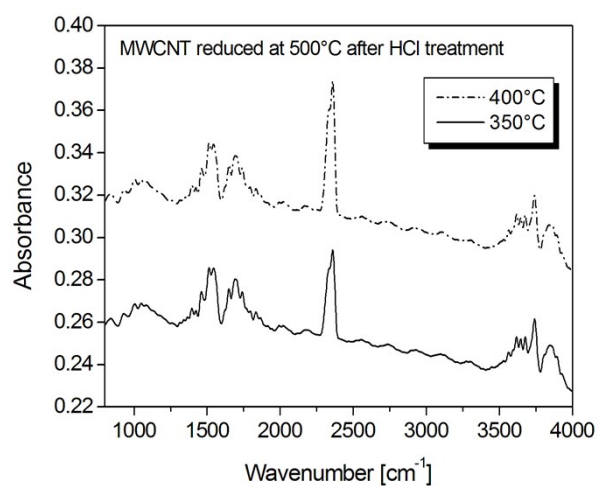

Fig.S3.FTIR spectra of adsorbed species taken after reduction at 500 °C and exposure of the following catalytic systems A) pristine MWCNT B) MWCNT cleaned with HCl to a 1 vol.% methanol-argon mixture at 300 and 400 °C.
